# Supplementary material
Source: Springer Nature journal article supplement (https://www.springermedizin.de/resource/supplementary/12890_2012_394_MOESM1_ESM.pdf/9505134)
Supplement: MOESM1 [file 9505134]

**Table S1.** Serum glutamate-pyruvate transaminase and creatinine levels in healthy adults supplemented with phenylbutyrate and vitamin D<sub>3</sub> alone or in combination in different doses.

|           | Markers    | Day-0       | Day-4       | Day-8       |
|-----------|------------|-------------|-------------|-------------|
| Group-I   | SGPT       | 26.6 ± 17.8 | 35.5 ± 20.8 | 32.0 ± 16.0 |
|           | Creatinine | 57.7 ± 5.8  | 60.6 ± 7.4  | 63.6 ± 6.1  |
| Group-II  | SGPT       | 31.0 ± 31.2 | 24.2 ± 26.1 | 23.3 ± 26.0 |
|           | Creatinine | 64.2 ± 8.7  | 64.7 ± 7.8  | 60.3 ± 7.7  |
| Group-III | SGPT       | 15.3 ± 4.5  | 17.9 ± 6.6  | 17.4 ± 2.4  |
|           | Creatinine | 67 ± 11.4   | 69.3 ± 11.4 | 66.1 ± 9.4  |
| Group-IV  | SGPT       | 16.4 ± 10.3 | 13.8 ± 6.2  | 12.7 ± 4.7  |
|           | Creatinine | 64.5 ± 1.4  | 65 ± 7.7    | 55.8 ± 4.4  |
| Group-V   | SGPT       | 20.9 ± 6.5  | 19.9 ± 6.4  | 24.2 ± 10.3 |
|           | Creatinine | 61.4 ± 9.4  | 62.7 ± 9.2  | 66.1 ± 13.1 |

Note. Group-I: 250 mg PB b.d. + 5000 IU vitamin D<sub>3</sub> o.d.; Group-II: 500 mg PB b.d. + 5000 IU vitamin D<sub>3</sub> o.d.; Group-III: 1000 mg PB b.d. + 5000 IU vitamin D<sub>3</sub> o.d.; Group-IV: 500 mg PB b.d.; Group-V: 5000 IU vitamin D<sub>3</sub> o.d. Data expressed as Mean ± Standard Deviation. One Way Analysis of Variance (ANOVA) method was used. PB- Phenylbutyrate; SGPT- Serum Glutamate Pyruvate Transaminase; b.d. - twice daily; o.d. - once daily. SGPT values are given as IU/L; creatinine values are given as mg/L. The normal range for SGPT and creatinine are (0.01-56 IU/L) and (45-106 µmol/L) respectively. One Way Analysis of Variance (ANOVA) method was used.
